# Supplementary material
Source: PubMed Central journal article supplement (PMC2957520)
Supplement: NIHMS234274-supplement-01.pdf [file NIHMS234274-supplement-01.pdf]

## Supplemental Table 1 - Cell counts in *Pdcd2* preimplantation embryos

| Geno            | CDX2+ | DAPI + CDX2- | Total Cells | % CDX2+ | Stage                 |
|-----------------|-------|--------------|-------------|---------|-----------------------|
| <b>Litter 1</b> |       |              |             |         |                       |
| -/-             | 19    | 2            | 21          | 90      | morula                |
| +/-             | 21    | 10           | 31          | 68      | late morula           |
| +/+             | 22    | 9            | 31          | 71      | early blastocyst      |
| +/-             | 29    | 15           | 44          | 66      | blastocyst            |
| +/+             | 29    | 10           | 39          | 74      | blastocyst            |
| +/+             | 17    | 12           | 29          | 59      | late morula           |
| +/+             | 15    | 0            | 15          | 100     | early morula/abnormal |
| <b>Litter 2</b> |       |              |             |         |                       |
| -/-             | 20    | 3            | 23          | 87      | morula                |
| +/-             | 13    | 1            | 14          | 93      | early morula          |
| +/+             | 22    | 7            | 29          | 76      | morula                |
| +/-             | 14    | 3            | 17          | 82      | early morula          |
| +/+             | 23    | 1            | 24          | 96      | morula                |
| -/-             | 10    | 7            | 17          | 59      | early morula          |
| +/-             | 24    | 5            | 29          | 83      | late morula           |
| +/-             | 22    | 9            | 31          | 71      | early blastocyst      |
| <b>Litter 3</b> |       |              |             |         |                       |
| +/+             | 23    | 5            | 28          | 82      | blastocyst            |
| +/+             | 15    | 15           | 30          | 50      | blastocyst            |
| +/+             | 22    | 8            | 30          | 73      | blastocyst            |
| +/-             | 18    | 7            | 25          | 72      | early blastocyst      |
| +/+             | 11    | 7            | 18          | 61      | morula                |
| +/+             | 18    | 4            | 22          | 82      | morula                |
| +/-             | 20    | 11           | 31          | 65      | blastocyst            |
| +/+             | 11    | 4            | 15          | 73      | early blastocyst      |
| +/-             | 20    | 13           | 33          | 61      | blastocyst            |
| -/-             | 15    | 12           | 27          | 56      | blastocyst            |

|                    | # cells | % ICM |
|--------------------|---------|-------|
| <b>Morula</b>      |         |       |
| WT (4)             | 23.3    | 20.4% |
| MUT (2)            | 22.0    | 11.4% |
| <b>Blastocysts</b> |         |       |
| WT (7)             | 33.6    | 32.8% |
| MUT (1)            | 27.0    | 44.4% |

Legend - DAPI+, CDX2- cells are considered to be ICM, or non-trophoblast. Embryos were staged based on unstained appearance. Shaded rows represent embryos of similar developmental stages, either morula or blastocysts. These were averaged (parentheses) for comparisons in the Table at the bottom.
